# Supplementary material
Source: PubMed Central journal article supplement (PMC6150805)

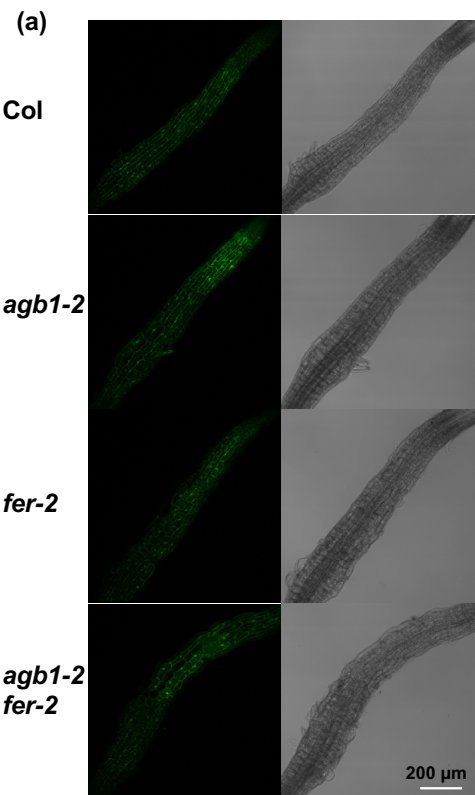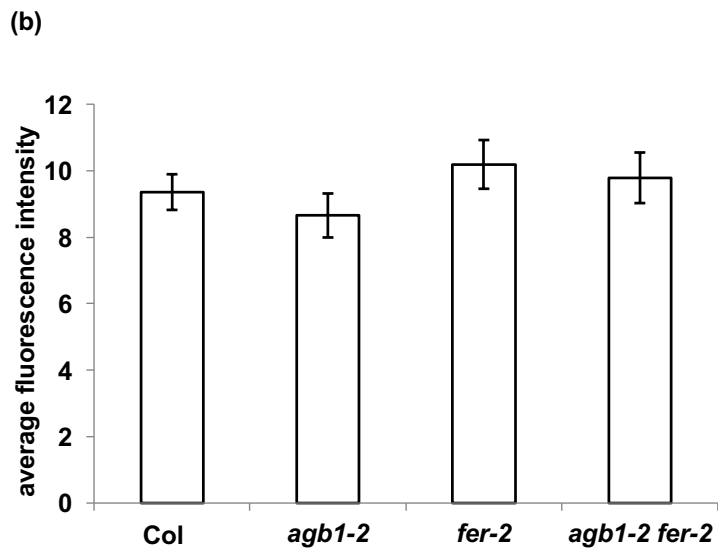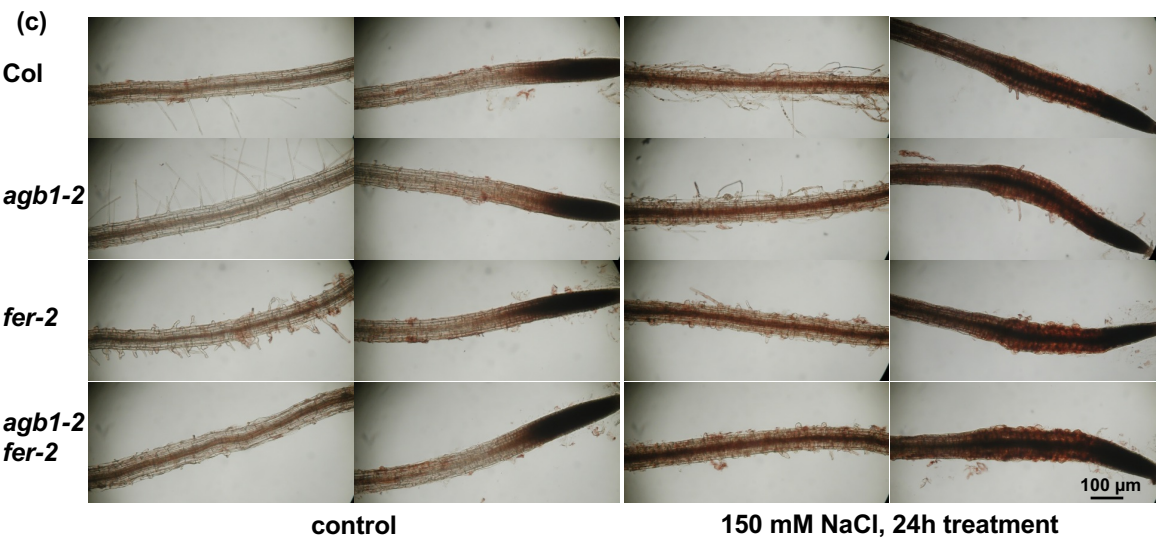

Supplement: NIHMS975962-supplement-Supp_FigS1.pdf [file NIHMS975962-supplement-Supp_FigS1.pdf]

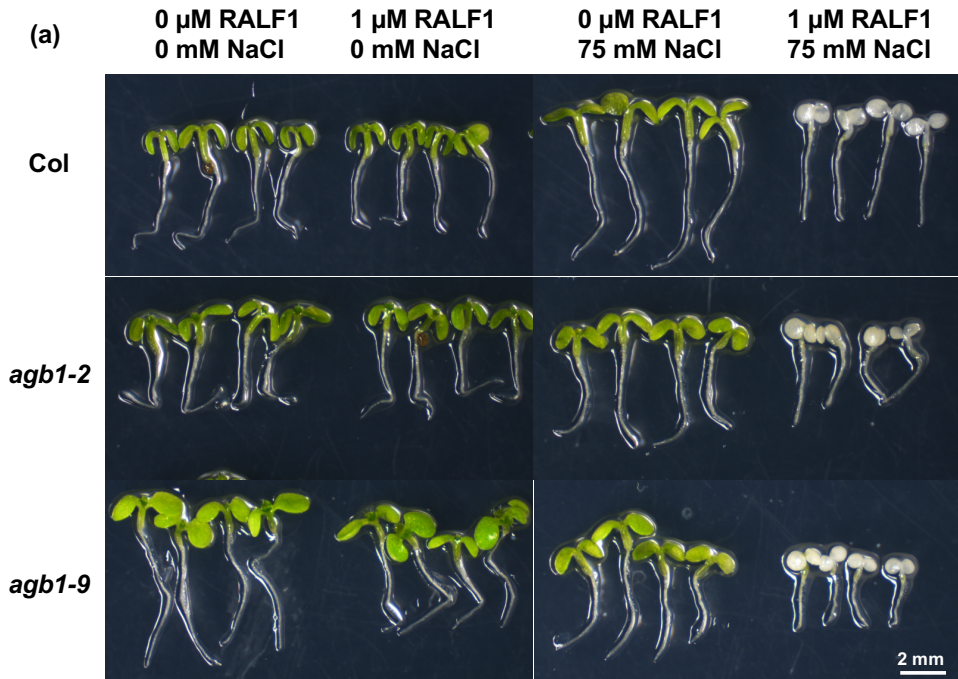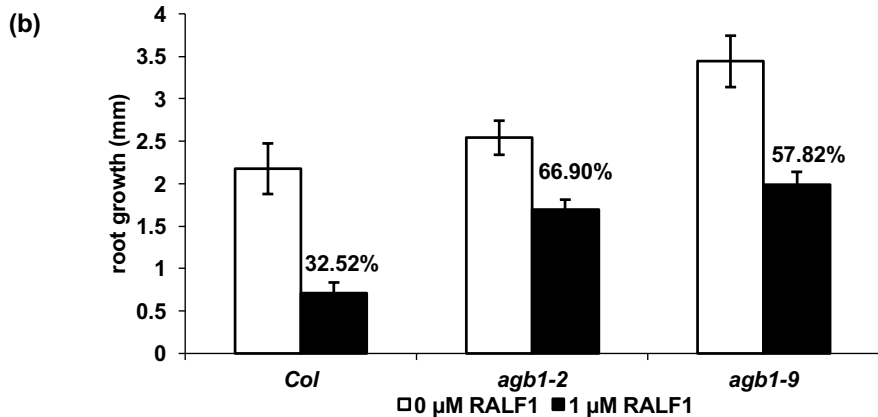

Supplement: NIHMS975962-supplement-Supp_FigS2.pdf [file NIHMS975962-supplement-Supp_FigS2.pdf]

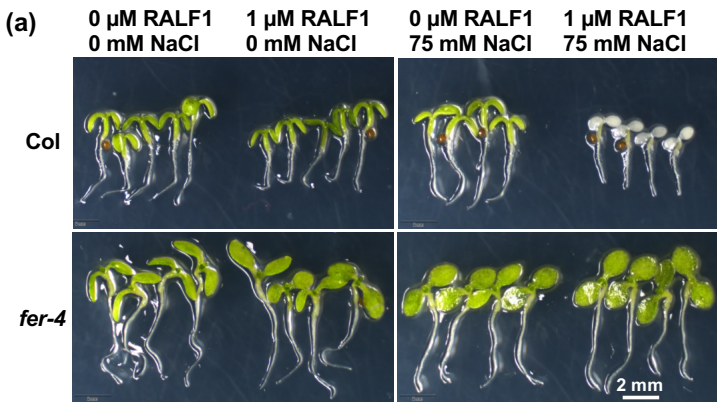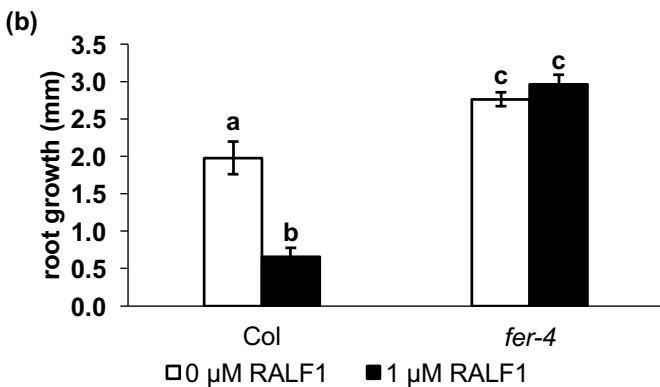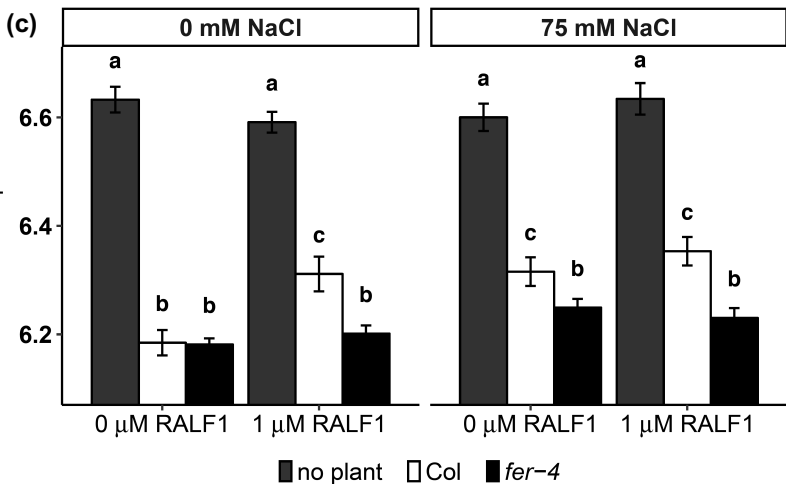

Supplement: NIHMS975962-supplement-Supp_FigS3.pdf [file NIHMS975962-supplement-Supp_FigS3.pdf]

relative fold change

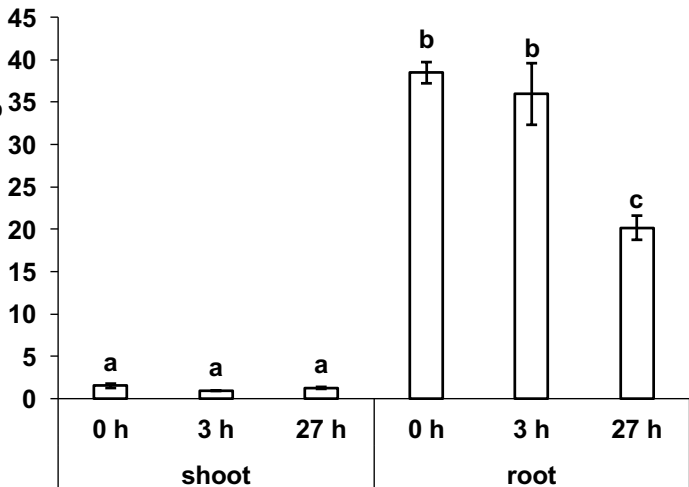

Supplement: NIHMS975962-supplement-Supp_FigS4.pdf [file NIHMS975962-supplement-Supp_FigS4.pdf]

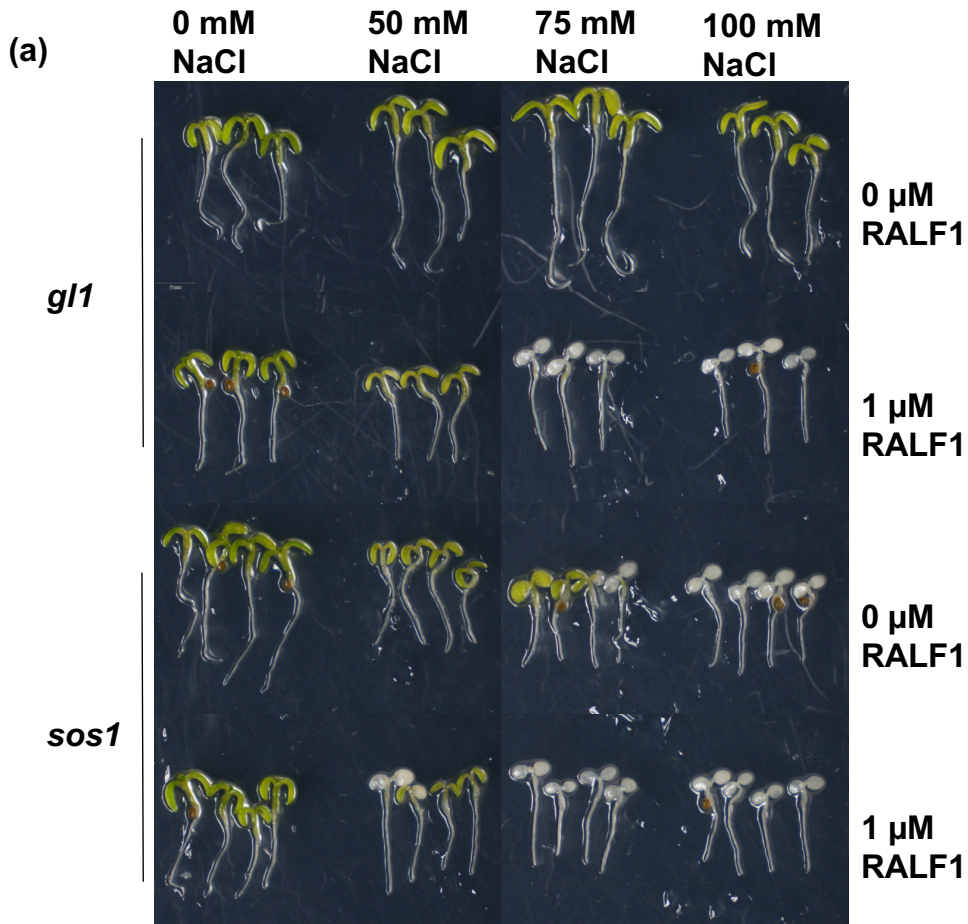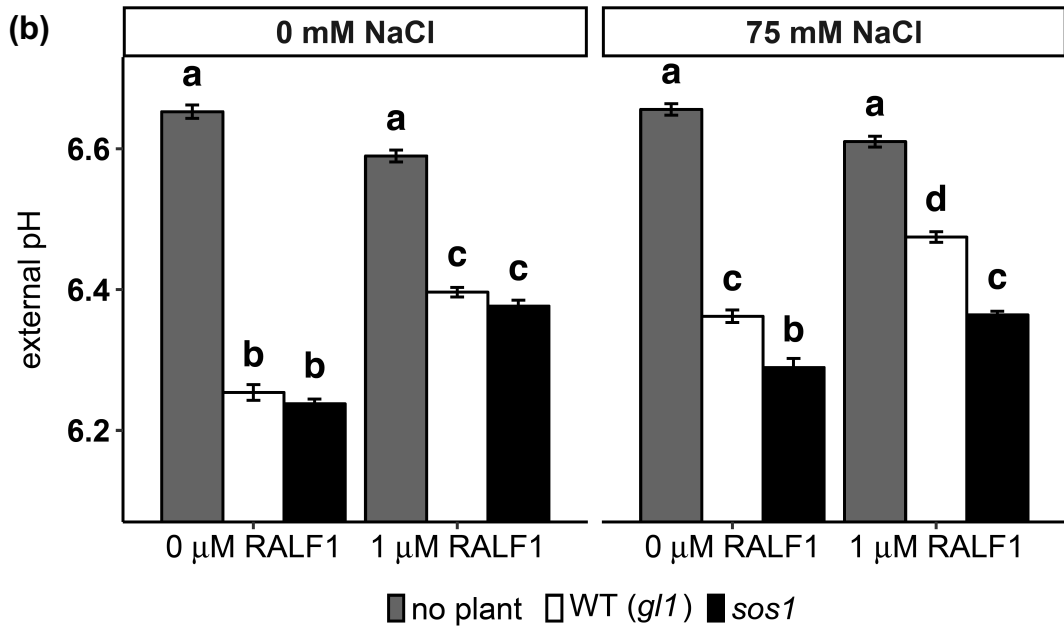

Supplement: NIHMS975962-supplement-Supp_FigS5.pdf [file NIHMS975962-supplement-Supp_FigS5.pdf]

relative fluorescence intensity

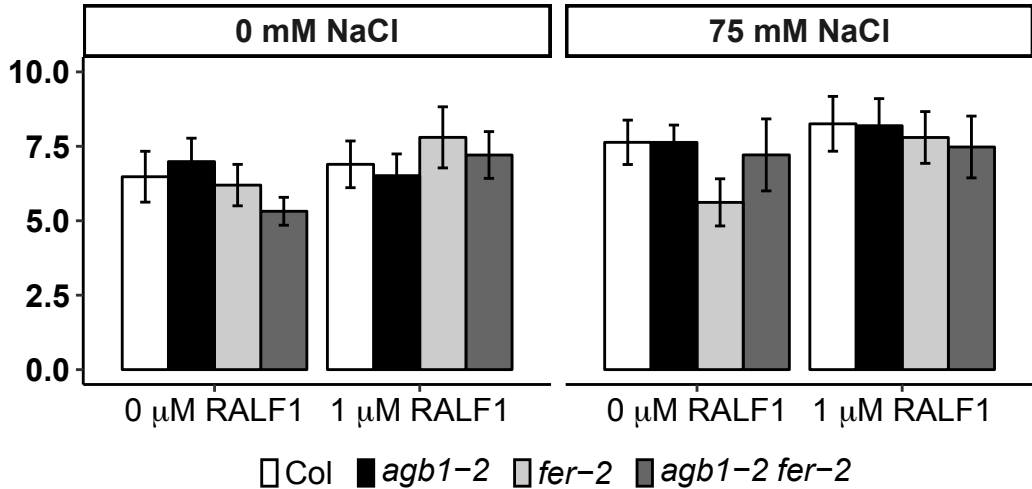

Supplement: NIHMS975962-supplement-Supp_FigS6.pdf [file NIHMS975962-supplement-Supp_FigS6.pdf]

control

1  $\mu$ M RALF1

75 mM NaCl

1  $\mu$ M RALF1  
+ 75 mM NaCl

Col

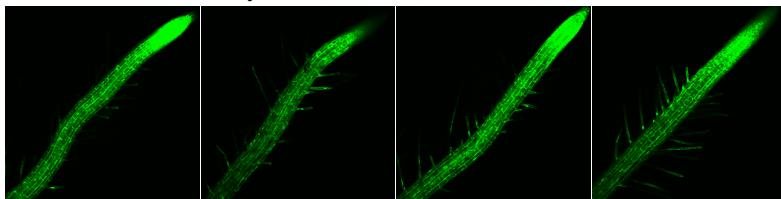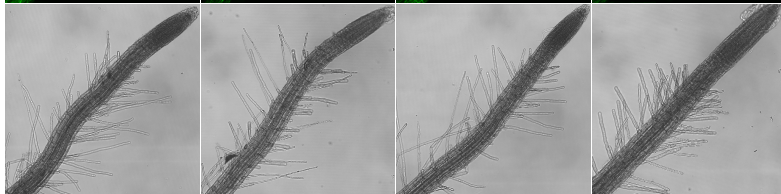*agb1-2*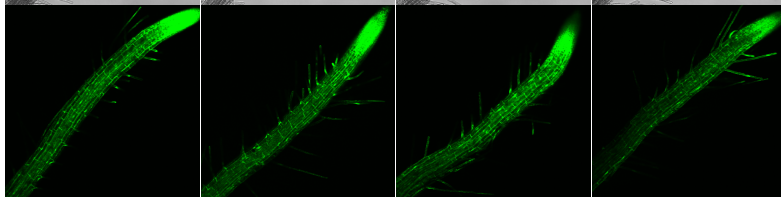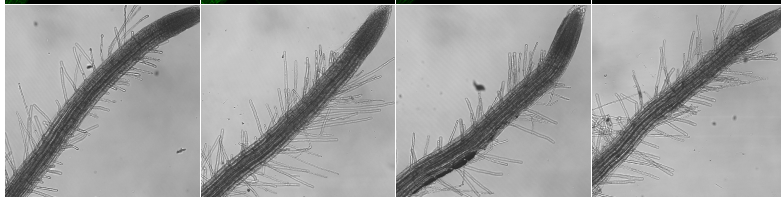*fer 2*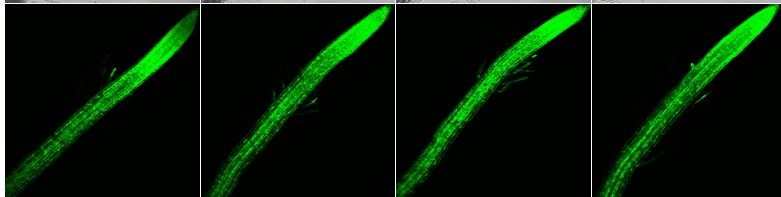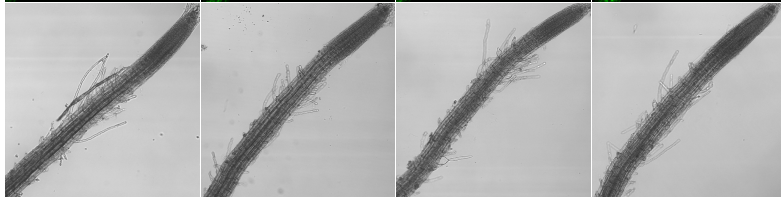*agb1-2*  
*fer-2*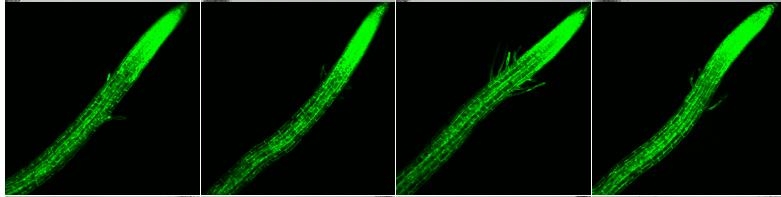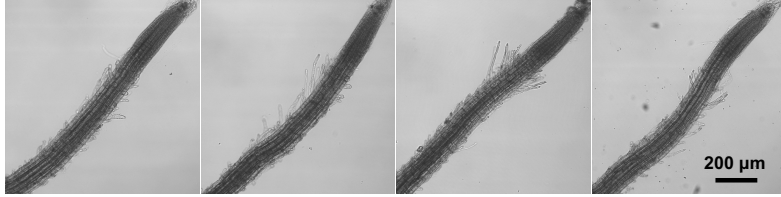

Supplement: NIHMS975962-supplement-Supp_FigS7.pdf [file NIHMS975962-supplement-Supp_FigS7.pdf]
